# Supplementary material
Source: PubMed Central journal article supplement (PMC3641846)
Supplement: NIHMS396202-supplement-Supplement1.pdf [file NIHMS396202-supplement-Supplement1.pdf]

## Supplementary Appendix

This appendix has been provided by the authors to give readers additional information about their work.

Supplement to: Schoen RE, Pinsky PF, Weissfeld JL, et al. Colorectal-cancer incidence and mortality with screening flexible sigmoidoscopy. *N Engl J Med* 2012;366:2345-57. DOI: 10.1056/NEJMoa1114635.

## Supplementary Appendix

Supplement to Schoen RE, et al. Incidence and Mortality from Colorectal cancer in the PLCO Flexible Sigmoidoscopy Screening Trial

### Contents

|                                                                                                                          |           |
|--------------------------------------------------------------------------------------------------------------------------|-----------|
| Figure S1: Consort Diagram                                                                                               | Page 2    |
| Table S1: Primary Treatment by Stage in Intervention and Usual Care Arms                                                 | Page 3    |
| Table S2: Location of Cancers in the PLCO Trial                                                                          | Page 4    |
| Table S3: Death Certificate Cause of Death, Excluding Prostate, Lung, Colorectal and Ovarian Cancer Deaths, by Study Arm | Page 5    |
| Statistical Supplement: Statistical Methods for Interim Monitoring of PLCO Colorectal Component                          | Page 6-8  |
| PLCO Trial Investigators                                                                                                 | Page 9-29 |

**Figure S1: Consort Diagram**

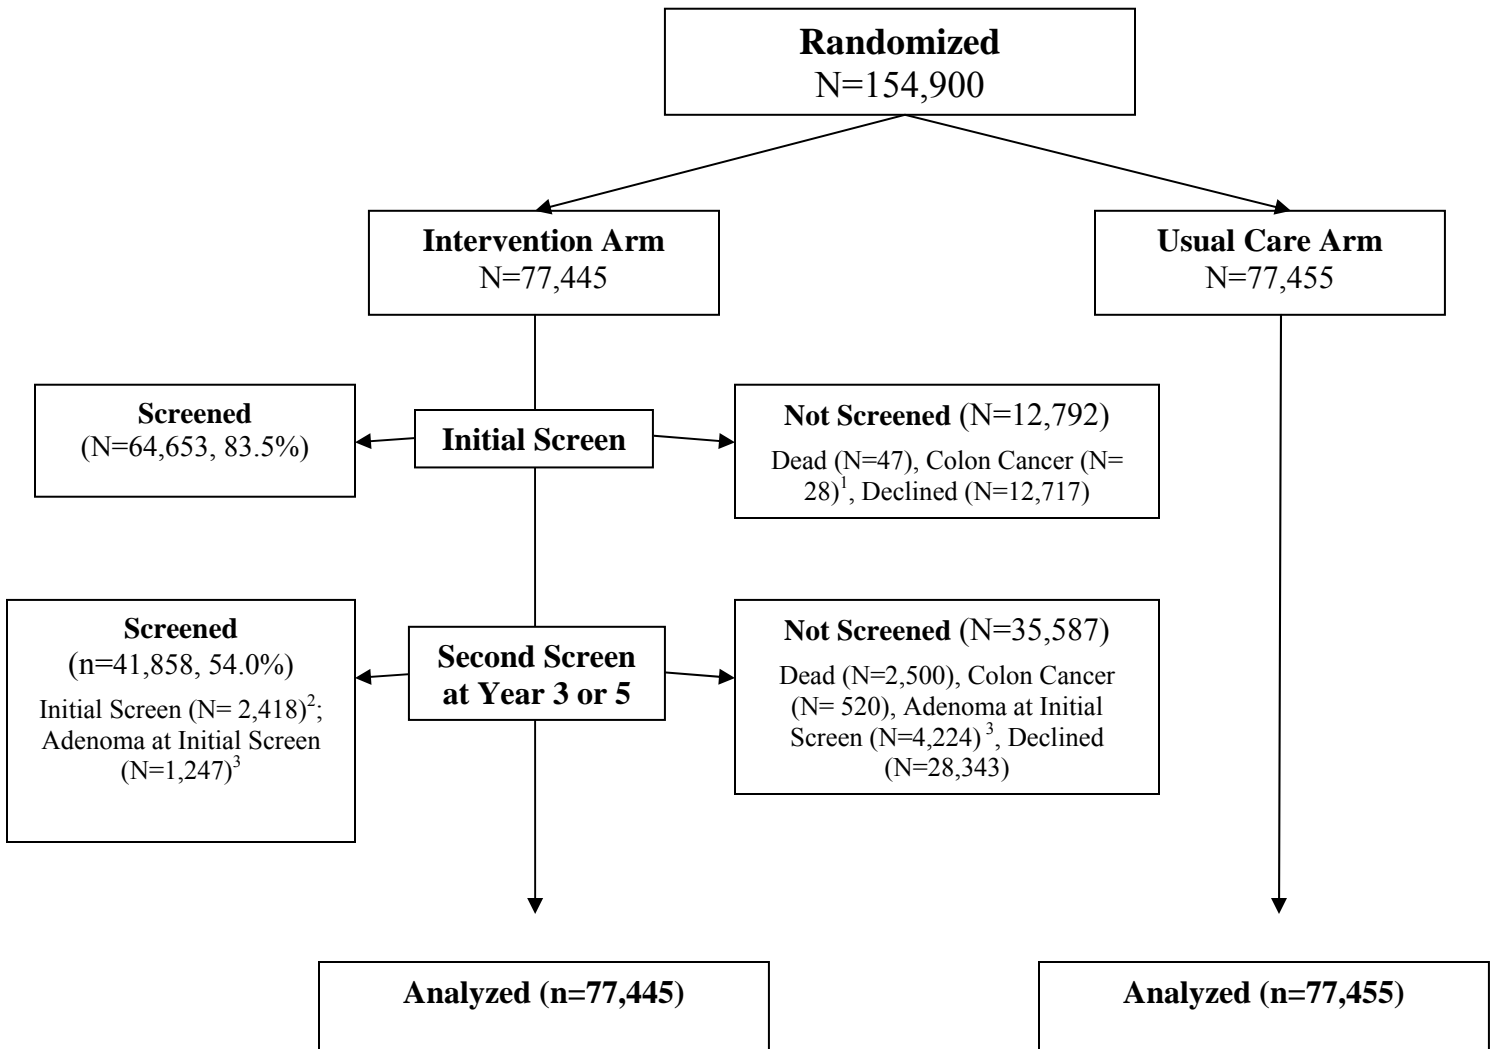

Figure S1 legend:

1. These patients were found after enrollment to have had preexisting diagnosis of colon cancer.
2. These subjects underwent their initial screening exam at year 3 or at year 5.
3. These subjects had an adenoma detected after an abnormal initial sigmoidoscopy screen. Some subjects with adenomas (1247/5471, 22.8%) returned for repeat screening.

Table S1: Primary Treatment by Stage in Intervention and Usual Care Arms

|                    |              | Resection Alone |    | Resection and Chemotherapy and/or Radiation |    | Chemotherapy and/or Radiation without Resection |    | Total |
|--------------------|--------------|-----------------|----|---------------------------------------------|----|-------------------------------------------------|----|-------|
|                    |              | N               | %  | N                                           | %  | N                                               | %  | N     |
| Stage              |              |                 |    |                                             |    |                                                 |    |       |
| Stage I            | Intervention | 297             | 90 | 27                                          | 8  | 6                                               | 2  | 330   |
|                    | Usual Care   | 365             | 90 | 32                                          | 8  | 7                                               | 2  | 404   |
| Stage II           | Intervention | 157             | 66 | 79                                          | 33 | 2                                               | 1  | 238   |
|                    | Usual Care   | 193             | 63 | 109                                         | 36 | 5                                               | 2  | 307   |
| Stage III          | Intervention | 29              | 12 | 211                                         | 88 | 1                                               | 0  | 241   |
|                    | Usual Care   | 45              | 14 | 278                                         | 86 | 2                                               | 1  | 325   |
| Stage IV           | Intervention | 22              | 17 | 85                                          | 66 | 21                                              | 16 | 128   |
|                    | Usual Care   | 25              | 13 | 125                                         | 67 | 37                                              | 20 | 187   |
| Total <sup>1</sup> |              | 1133            | 52 | 946                                         | 44 | 81                                              | 4  | 2160  |

<sup>1</sup> There are 75 participants in the Intervention and 64 participants in the Usual Care arms for whom colorectal cancer stage and/or primary treatment information is not available.

Table S2: Location of Cancers in the PLCO Trial

|                  | Intervention | Usual Care |
|------------------|--------------|------------|
| Distal Colon     | 479          | 669        |
| Rectum           | 190          | 240        |
| Recto-Sigmoid    | 28           | 57         |
| Sigmoid          | 195          | 292        |
| Descending Colon | 38           | 50         |
| Splenic Flexure  | 28           | 30         |
| Proximal Colon   | 512          | 595        |
| Transverse Colon | 82           | 83         |
| Hepatic Flexure  | 50           | 81         |
| Ascending Colon  | 176          | 202        |
| Cecum            | 204          | 229        |
| Unknown          | 21           | 23         |
| Total            |              |            |

Table S3: Death Certificate Cause of Death, Excluding Prostate, Lung, Colorectal and Ovarian Cancer Deaths, by Study Arm

|                                                                      | Intervention (N=77,445) | Usual Care (N=(77,455) |
|----------------------------------------------------------------------|-------------------------|------------------------|
|                                                                      | N (%)                   | N (%)                  |
| Non-PLCO Cancers <sup>1</sup>                                        | 2266 (24.8)             | 2227 (24.2)            |
| Ischemic heart disease                                               | 1623 (17.8)             | 1592 (17.1)            |
| Cerebrovascular accident                                             | 545 (6.0)               | 546 (5.9)              |
| Other circulatory disease <sup>2</sup>                               | 1332 (14.6)             | 1411 (15.2)            |
| Respiratory disease                                                  | 1006 (11.0)             | 1012 (10.9)            |
| Digestive disease                                                    | 322 (3.5)               | 306 (3.3)              |
| Infectious disease                                                   | 205 (2.2)               | 190 (2.0)              |
| Endocrine, nutritional and metabolic diseases and immunity disorders | 362 (4.0)               | 381 (4.1)              |
| Diseases of nervous system                                           | 356 (3.9)               | 375 (4.0)              |
| Accident                                                             | 470 (5.1)               | 480 (5.2)              |
| Other                                                                | 651 (7.1)               | 746 (8.0)              |
| Total                                                                | 9138                    | 9286 <sup>3</sup>      |

1. Excluding deaths from Prostate, Lung, Colorectal, and Ovarian cancer

2. Includes cardiovascular, arterial, and cardiopulmonary disease

3. Deaths from non PLCO cancers were similar in the two arms (RR 0.98, 95%CI 0.96-1.01, p=0.28)

## Statistical Methods for Interim Monitoring of PLCO Colorectal Component

Differences in mortality rates were assessed using a weighted log-rank (WLR) test, incorporating increasing weights proportional to the pooled colorectal cancer mortality (1). A weighted statistic was chosen because of the presumed delayed effect of screening upon colorectal cancer mortality. Interim analyses were performed at least annually beginning in 2002 and were presented to the trial DSMB. The interim analysis plan, adopted by the DSMB, stipulated monitoring the WLR statistic for efficacy and futility. A one-sided efficacy boundary was constructed via the Lan-Demets procedure using an O'Brien-Fleming spending function and a total probability of type I error of 5% (2). Total weighted information was derived by projecting the time required to obtain 3796 events as stipulated in the design, which was determined to be roughly 21 years after the initial randomization using the method outlined in expression 8.9 of (3). Beginning with the 10<sup>th</sup> interim analysis, increments to the information fraction were modified to reflect linear growth in information with study termination at a maximum follow-up time of 13 years. In order to allow for early stopping due to lack of effectiveness or harm, the monitoring design also stipulated a non-binding futility boundary, constructed via the stochastic curtailment procedure (4).

At each interim analysis, we first calculated the weighted information fraction as the ratio of the current WLR statistic variance to the projected variance of the WLR statistic at the scheduled trial conclusion,  $\tau = 13$  years. This end of trial variance was projected using the method outlined following expression 8.7 of [3]. We then calculated the one sided efficacy boundary point,  $b_k$ , according to the Lan-Demets procedure as indicated above. Next, a futility boundary point,  $a_k$ , was derived according to the stochastic curtailment procedure in the following way. The stochastic curtailment procedure for futility is based upon the conditional

$$\mathbb{P}_{H_A}\{Z_\tau < b_{\text{end}} | Z_{t_k}\} = \Phi\left(\frac{(b_{\text{end}} - \mu(\tau)) - (\sqrt{f_k}Z_{t_k} - \mu(t_k))}{\sqrt{1 - f_k}}\right) \quad (1)$$

probability under the design alternative hypothesis,  $H_A$ , that the

end of trial WLR statistic will not reject the null given the current value of the WLR statistic at analysis  $k$ : for designs having a positive alternative hypothesis with slight modifications for

designs in which the alternative hypothesis is negative. In the above,  $Z_{t_k}$  is the current value of the WLR statistic,  $f_k$  is the weighted information fraction, and  $\mu(t_k)$  and  $\mu(\tau)$  are values of the drift function at the current analysis and at the scheduled end of the trial, This conditional probability is compared to a threshold value,  $p_c$ , with values in excess being considered futility boundary crossings. The stochastic curtailment procedure is equivalent to a sequence of futility boundary points on the standard normal scale according to the following expression:

$$a_k = \frac{b_{\text{end}} - (\mu(\tau) - \mu(t_k)) - \sqrt{1 - f_k} \Phi^{-1}(p_c)}{\sqrt{f_k}}. \quad (2)$$

We used the threshold value  $p_c = 0.90$ . The end of trial drift was projected using the design alternative logged relative risk  $\log(0.90)$ , under the constant shape assumption according corollary 4.3 of [3].

The sequential one sided p-value of the test statistic was derived using stage-wise ordering according expression 5.4 of [3]. The primary aim was summarized in the following way. Without unequal weighting of events, the test statistic and its sequential 95% confidence interval correspond via a scale change to the logged relative risk,  $\beta$ , and its sequential 95% confidence interval, CI. When unequal weighting is used, as in the present situation, such a relationship exists, but the prediction interval is now based upon a weighted average logged relative risk,  $\beta^*$ , and its sequential 95% confidence interval, CI\*. We report the usual logged relative risk,  $\beta$ , together with a confidence interval, centered about it, obtained from the sequential design. This choice, made a-priori, is based upon the greater conservatism, in this particular case, of the usual logged relative risk,  $\beta$ , as compared with the weighted average logged relative risk,  $\beta^*$ .

## **Results**

### ***Interim Analyses***

Values of the weighted information fraction, WLR statistic, and efficacy and futility boundary points are listed in table 2. The sign is consistent with a negative value of the alternative hypothesis,  $\log(0.90)$



**Table 2:** WLR statistic, weighted information fraction and efficacy and futility boundary points on the standard normal scale.

| <i>Analysis</i> | <i>Wtd information fraction</i> | <i>WLR statistic</i> | <i>Efficacy Boundary</i> | <i>Futility Boundary</i> |
|-----------------|---------------------------------|----------------------|--------------------------|--------------------------|
| 1               | 0.0011                          | -0.067               | -8.210                   | 19.954                   |
| 2               | 0.0019                          | 0.325                | -8.210                   | 14.938                   |
| 3               | 0.0031                          | 0.317                | -8.210                   | 11.617                   |
| 4               | 0.0069                          | 0.023                | -8.210                   | 7.584                    |
| 5               | 0.0090                          | -0.842               | -8.210                   | 6.534                    |
| 6               | 0.0118                          | -1.421               | -8.210                   | 5.602                    |
| 7               | 0.0182                          | -0.186               | -8.210                   | 4.318                    |
| 8               | 0.0295                          | -1.454               | -8.210                   | 3.135                    |
| 9               | 0.0444                          | -2.073               | -8.210                   | 2.279                    |
| 10              | 0.3176                          | -4.077               | -3.288                   | 1.978                    |

***Test Statistic, P-value and Prediction Interval***

The test statistic, -4.077, had a one-sided 95% sequential p-value of  $2.15 \times 10^{-5}$ . The logged crude relative risk and its two-sided 95% sequential confidence interval were determined to be -0.303 (-0.466 to -0.140). The weighted average logged relative risk and its two-sided 95% sequential confidence interval were determined to be -0.415 (-0.506 to -0.323). These results correspond to the second line of the algorithm summarized in table 1 which yielded -0.303 (-0.466 to -0.140).

Reference List

- (1) Proschan MA, Lan KKG, Wittes JT. Statistical Monitoring of Clinical Trials: A Unified Approach. New York: Springer-Verlag; 2006.
- (2) Demets DL, Lan G. The alpha spending function approach to interim data analyses. [Review] [84 refs]. Cancer Treatment & Research 1995;75:1-27.
- (3) Izmirlan G. Estimation of the relative risk following group sequential procedure based upon the weighted log-rank statistic. ArXiv 2011 February. Available from: URL: <http://arxiv.org/abs/1102.5088I>
- (4) Lin DY, Yao Q, Ying ZL. A general theory on stochastic curtailment for censored survival data. Journal of the American Statistical Association 1999;94(446):510-21.

## PLCO Trial Investigators (\*denotes former employee)

---

### National Cancer Institute Staff and Consultants (Bethesda, Maryland)

#### Project Officer

Chief, Early Detection Research Group, DCP  
Christine D. Berg, MD  
John K. Gohagan, PhD, FACE\*

Director of Communications  
Dorothy Sullivan

#### Economist

Martin Brown, PhD

#### Associate Project Officer and Senior Statistician

Chief, Biometry Research Group, DCP  
Philip C. Prorok, PhD

#### Program Specialist

Jennifer Gaegler  
Linda Gray\*  
Amanda Hansborough

#### PLCO Etiology and Early Markers Principal Investigator

Ann W. Hsing, PhD  
James V. Lacey, Jr., PhD\*  
Mark Purdue, PhD  
Richard B. Hayes, PhD\*

#### Director, DCP

Peter Greenwald, MD, DrPH

#### Director, DCEG

Joseph F. Fraumeni, JR., MD

#### Staff Scientist

Amanda Black, PhD, MPH  
Wen-Yi Huang, PhD

#### Statisticians

Richard M. Fagerstrom, PhD  
Ping Hu, PhD  
Grant Izmirlian, PhD  
David L. Levin, MD, MS\*  
Paul Pinsky, PhD  
Jian-Lun Xu, PhD.

#### Assistant Project Officer for Minority Issues

Nancy K. Simpson, ScM\*

#### Assistant Project Officer

Richard Cumberlin, MD\*  
Susan Rossi, PhD, MPH\*  
Kelly Yu, PhD

#### Epidemiologists

Aimee Kreimer, PhD\*  
Pamela M. Marcus, PhD, MS

#### Biorepository Manager

Claire Zhu, PhD

#### Research Nutritionist

Amy F. Subar, PhD, MPH, RD\*

#### Biomedical Engineer

Guillermo Marquez, PhD

#### Director, Division of Cancer Prevention

Peter Greenwald, MD, DrPH\*  
Barnett S. Kramer, MD, MPH

#### Coordinator and Assistant Project Officer

Joyce E.H. Browne\*

#### Senior Investigators

Patricia Hartge, ScD  
Robert N. Hoover, MD, ScD  
Regina G. Ziegler, PhD, MPH

#### Contracts Officer, RCB

Susan Hoffman

#### Contracts Specialist

Deborah Baca  
Dorothy M. Coleman\*  
Charles Jackson\*  
Erin Lange\*  
Mary Loesch  
Dorothy McMillan\*  
Evantha Papadopoulos\*  
Desiree Sylver-Foust\*  
Rachel Weiszer

#### Consultant

Richard Costlow, PhD\*  
Andrew F. Laine, DSc\*  
Anthony B. Miller, MB  
Dinah Pearson, MHA\*  
John R. van Nagell, MD\*

#### Collaborators, Centers for Disease Control and Prevention

Fred L. Stallings, MD, MPH\*  
Daniel S. Miller, MD\*

---

**Central Laboratory (LAB): University of California at Los Angeles (Los Angeles, California)**

Principal Investigator

David Chia, PhD  
Sarah Dry, MD  
David Seligson, MD  
Paul Terasaki, PhD\*

Coordinator

Jean Reiss, MT  
Sheila Tze

Laboratory Technician

Andrew Acalinovich\*  
Stefan Besada  
Henry Chan, MS  
Gardenia Cheung-Lau  
Shaun Corbett\*  
Patty Durongwong  
Mervi Eeva  
Labo Folayan  
Bianca Gruebel  
Omar Habeeb  
Kiet Huynh\*  
Cindy Kanegai\*  
Helen Kim\*  
Sarang Kim  
Ara Ko  
Sean Kohlmeier\*  
Cassandra Lamb  
Marianne Lu, MT\*  
June Martin, MT\*  
Scott Maynard\*  
Fred Noravian\*  
Osvaldo Schirrippa  
Gabriel Padilla\*  
Alexis Rumbin  
Linda Shevlin  
Rica Ty\*  
Qun Wang  
Joanne Wong\*  
Shuang Xu  
Hong Yu

---

**Biorepository and Biorepository Processing Lab (Frederick, Maryland)**

Coordinator

Janis Koci, BS

Laboratory Coordinator

William Kopp, PhD

Laboratory Supervisor

Helen Rager

Laboratory Research Technician

Craig Smith  
Dave Roser

---

**Coordinating Center (CC): Westat, Inc. (Rockville, Maryland)**

|                                                                                                                                                                                                                                                                                                                                                                                                                                                                                                                                                                                                            |                                                                                                                                                                                                                                                                                                                                                                                                                                                                                                                                                                                                                                                                                                                                           |
|------------------------------------------------------------------------------------------------------------------------------------------------------------------------------------------------------------------------------------------------------------------------------------------------------------------------------------------------------------------------------------------------------------------------------------------------------------------------------------------------------------------------------------------------------------------------------------------------------------|-------------------------------------------------------------------------------------------------------------------------------------------------------------------------------------------------------------------------------------------------------------------------------------------------------------------------------------------------------------------------------------------------------------------------------------------------------------------------------------------------------------------------------------------------------------------------------------------------------------------------------------------------------------------------------------------------------------------------------------------|
| Corporate Officer<br>Jack Cahill, MA                                                                                                                                                                                                                                                                                                                                                                                                                                                                                                                                                                       | Mary Sabastianelli*                                                                                                                                                                                                                                                                                                                                                                                                                                                                                                                                                                                                                                                                                                                       |
| Project Director<br>Barbara O'Brien, MPH<br>Susan Gardner, PhD*                                                                                                                                                                                                                                                                                                                                                                                                                                                                                                                                            | Coordinator<br>Amy Miller, MPH<br>Fay Menacker, PhD*<br>Mollie Miedzinski, MPH*                                                                                                                                                                                                                                                                                                                                                                                                                                                                                                                                                                                                                                                           |
| Deputy Project Director<br>Danielle Carrick, PhD<br>Susan Yurgalevitch, MS, MPH<br>Marsha Dunn, MPH*                                                                                                                                                                                                                                                                                                                                                                                                                                                                                                       | Research Assistant<br>Shaima Chowdry<br>Lindsay Miesko<br>Cathy Lease*<br>Melinda Rinehart*                                                                                                                                                                                                                                                                                                                                                                                                                                                                                                                                                                                                                                               |
| Study Manager<br>Cheryl Bailey, MPH*<br>Yancy Bodenstein, MPH*<br>Peggy Burr, MPH, PA-C*<br>Jacqueline Cutrin*<br>Joseph Eisen, MPH*<br>Amena Frias, MPH*<br>Sara Glashofer, MPH*<br>Kathy Hurt-Mullen, MPH*<br>Katie Kavounis, MPH<br>Polly Ke<br>Fauzia Khanani*<br>Benjamin Laimon, MBA*<br>Leah Mechanic, PhD, MPH*<br>Mary Mesnard<br>Leah Nichaman*<br>Shama Novey, MBA*<br>Cindy Palace, MPH*<br>Steve Peace*<br>Karen Pettit<br>Stuart Pratt, MPH*<br>Lawrence Ragard, MD<br>Jennifer Rosenbaum, MPH*<br>Demaris Sanchez, MPH*<br>Shari Schuman*<br>Mark Stewart, MPH*<br>Mary Beth Waterman, MPH* | Systems Staff<br>Maks Agamir*<br>Kamla Awatramani*<br>John Barbee*<br>William Christopher Barlow*<br>Donna Beach*<br>Barbara Bradley<br>Karen Brenner<br>Lois Butler*<br>Joel Bristor, MS*<br>Clifford Caughman, MS*<br>Ramachandra Chanapatna<br>Linda Cranson*<br>Jerry Desir, MA*<br>Katheryn Donegan, JD*<br>John Fleming*<br>Michael Florczyk<br>Jeff Galyon*<br>Christopher Gordon, MS*<br>Cheol Han, MS*<br>Aubrey Hendricks*<br>Donna Hickman*<br>Maggie Ho<br>Elizabeth Jackson, MA*<br>Dalia C. Kahane, PhD<br>Asia Khan, MPH<br>Mei Laio<br>Annabelle Lee, MLS*<br>Ben Lott<br>Donna Lucas-Mudd, MS*<br>Diane Moore*<br>Alan Morgan<br>Gabriel Neagu<br>Peter Ohan*<br>Margarita Revzin, MS*<br>Joseph Rychlec<br>Reza Samiel* |
| Systems Manager<br>Keith Umbel<br>Donna Ferrantello, MPA*<br>Bobbie Havel, MS*                                                                                                                                                                                                                                                                                                                                                                                                                                                                                                                             |                                                                                                                                                                                                                                                                                                                                                                                                                                                                                                                                                                                                                                                                                                                                           |
| Systems Director<br>Marsha A. Hasson, MS                                                                                                                                                                                                                                                                                                                                                                                                                                                                                                                                                                   |                                                                                                                                                                                                                                                                                                                                                                                                                                                                                                                                                                                                                                                                                                                                           |
| Data Manager<br>Beth Bridgeman<br>Ellen Martinusen                                                                                                                                                                                                                                                                                                                                                                                                                                                                                                                                                         |                                                                                                                                                                                                                                                                                                                                                                                                                                                                                                                                                                                                                                                                                                                                           |

Erin Siford  
Desiree Simons, MSc  
Matthew Smith \*  
Liyun Swei  
Elias Theodorou\*  
Aleksandr Vakhlis  
Judith H. Walsh\*  
Blaine Wenzel, MS

Marianne Whitlock, MBA, MA \*  
Steve Williamson\*  
Maureen Wu, MS\*  
Cheng-Lan Yang\*  
Sekou Yoda  
Maureen Wu, MS

**NOVA Research Company (Bethesda, Maryland)**

Project Manager, Biostatistician  
Max H. Myers, PhD\*

Deputy Project Director  
Paul A. Young, MBA, MPH\*

Project Manager/Senior Analyst  
Denise A.R. Lewis\*  
Robert W. Francis Jr, PhD\*

Project Coordinator/Statistical Analyst  
Lori A. Saunders, MA\*  
Carmita Signes\*

Systems Analyst/Programmer  
Susan Scheck, MSLS\*

---

**Information Management Systems, Inc. (Rockville, Maryland)**

Corporate Officer  
William Lake, Jr., BA

Project Manager  
Thomas Riley, BS

Senior Systems Analyst  
Joe Austin, BS  
Diane E. Erwin, MA  
Doug Flynn  
Jerome E. Mabie, BS

System Analyst  
Jonathan D. Clapp, BS\*  
Matthew R. Moore, BS  
FangFang Xu, MIS

Senior Programmer/Analyst  
Gordon C. Jones, MS  
Joshua M. Rathmell  
Craig R. Williams  
Michael Young, BS

Programmer/Analyst  
Andrew Goodman, BS  
Thomas P. Hickey

Senior Programmer  
John M. Commins  
Patrick Wright

Programmer  
Sally K. Shaul

---

## University of Colorado Denver (Denver, Colorado)

Principal Investigator  
E. David Crawford, MD

Project Coordinator  
Sheryl L. Ogden, RN

Coordinator Hispanic Recruitment/Retention  
Sally Tenorio, RN

Nurse Screener  
Peggy Fyles, RN  
Diane Golz, RN\*  
Stacy Hommel, RN\*  
Deborah McCormick, RN\*  
Gale Pashleigh, RN\*  
Nancy Slimak, RN\*  
Nancy Turner, RN\*

Data Coordinator  
Nicole Green Ayodeji\*  
Denise Josse\*  
Julie McAfee\*  
Eric Meskimen\*  
Jenny Pennington\*  
Wendy Suchey\*

Data Manager  
Mashal Ali-Ahmadi\*  
Amy Wheeler Barnett\*  
Jennifer Brothers\*  
Nicole Davis Chronister\*  
Danielle Cipolla\*  
Ryan Crawford\*  
Sung Chun\*  
Karina Gebhart\*  
Jhenny Hernandez\*  
Helen Hunter\*  
Kanak Patel  
Wendy Poage\*  
Meegan Pozzetta\*  
Shayna Simms\*  
Jeff Swingler\*  
Cory Taylor\*  
Marie Turner\*  
Ariana Wallack\*

Nosologist  
Kathleen Curtis  
Darlene Pierce

Medical Record Abstractor  
Patricia Vallejos Borrego

Recruiter  
Chris Rundus\*

Eloise Bonde\*

Recruitment/Retention Coordinator  
Eduard Gamito\* (deceased)

Retention Coordinator  
Shannon Pretzel

Administrative Assistant  
Joanne Dahmer\*  
Terri Deines\*  
Monica Geske\*  
Marcia Holladay\*  
Helen Jackson\*  
Tammy Jordan\*  
Eda Ordonez\*

Student Assistant  
Tia Beechum\*  
Marc Crawford\*  
Kristi Dittmer\*  
Alicia Donohue\*  
Felicia Garcia\*  
Scott Giese\*  
Amy Klenfield  
Melissa Kleinman\*  
Wendy Moss\*  
Kayo Motomiya\*  
Roger Murken\*  
Dana Neel\*  
Javan Quintela  
Carrington Razook\*  
Ali Shoaga\*  
Andrew Thompson\*  
Stephanie Vargas\*

Radiologist  
David Lynch, MD  
Martin O'Driscoll, MD\*  
Ron Townsend, MD\*  
Elizabeth Stamm, MD\*

Sonographer  
Julia Drose, RDMS, RDCS\*

Gynecologist/Oncologist  
Susan Davidson, MD

Gastroenterologist  
Dennis Ahnen, MD\*



Joel Levine, MD\*  
William Murchison, MD\*  
Steve Steinberg, MD\*

---

**Georgetown University (Washington, DC)**

Principal Investigator

Edward P. Gelmann, MD\*  
Claudine Isaacs, MD

Study Coordinator

Colleen McGuire, RN, MSN  
Nina Trocky, RN, MSN, CAN\*

Recruitment Coordinator

Christopher Bourdeau

Nurse Examiner

Polly Ke, RN

Data Manager

Laura Martino, BS  
Ipatia Apostolides\*  
Constance Elbon-Copp, M.Ed.\*  
Kimberly Klemm \*  
Catherine Lippman\*

Medical Secretary

Carol Klotz  
Tanita McLaurin\*

Project Assitant

Tanja Williams  
Johnsonette Ginyard

Medical Record Abstractor

Sara Cantrell, CTR\*

Gigi Marsh, ART, CTR\*

Amy Tran, BS\*

Chripina Wray, CTR

Baigalmaa Yondonsambu, CTR

Medical Technologist

Ciro Taddeo

Recruitment Coordinator

Kathleen Bennett\*

Tracy Bowen\*

Kathryn English\*

Kimberly Seaton\*

Retention and Operations Coordinator

Tiffanie Hammond, BS

Morgan Ford, MS\*

Kate Newman, MA\*

Nurse Examiner

Meg Kren, RN\*

Nancy English, RN\*

Dianne McKenzie, RN\*

**Pacific Health Research Institute (Honolulu, Hawaii)**

Principal Investigator

Lance A. Yokochi, MD, MPH  
Fred Gilbert, MD\* (deceased)

Investigators

David Curb, MD, MPH\*  
James Davis, PhD  
Bruce Kessel, MD  
James Navin, MD  
Helen Petrovich, MD  
Vicki Shambaugh, MA, MPH  
Frank Tabrah, MD  
Beth Waitzfelder, PhD  
Bradley Willcox, MD

Project Coordinator

Victoria Jenkins, BSN, MEd  
Rachelle Chasnoff\*  
Joanne Vander Does\*  
Jamaal Martin, MPH\*  
Barbara Ideta\*

Examiner

Kim Stryker, RN\*  
Elsie Batangan\*  
Liz Dolan\*  
Kristin Horton\*  
Karen Taylor\*  
Ted Tokumine, RN\*

Recruitment

Rebecca Troyer\*  
Sarah Barrow\*  
Susan Hayashida\*  
Shirley Commander\*

Data Manager

Louisa Turner

Data Assistant

Gladys Hino  
Esther Nakano  
Myrle Johnson  
Lilian Villaruz  
Anne Chung\*  
William Huynh\*  
Nika Hickey\*

Research Assistant

Marilyn Calulot  
Victoria Chun  
Cheryl Lewis

June Morfit

Joy Tani

Kathy Banggo\*

Amy Brunst\*

Wendy Francis\*

Leslie Grove\*

Brooke Holderbaum\*

Kim Kinney\*

Melanie Oginō

Teresa O'Sullivan\*

Medical Research Associate

Peggy Rowan-Lau, RN\*

Abstractor

Kathleen Bow, RN, CTR

Helene Shiratori, RN

Jean Tsukamoto, RN

Helene Hodges, CTR\*

Shirleen Hyun\*

Julia Kuiee, CTR\*

Lori Lucente, CTR\*

Pat Oshiro, CTR\*

Kathy Shota\*

---

## Henry Ford Health System (Detroit, Michigan)

### Principal Investigator

Paul A. Kvale, MD  
Raymond Demers, MD\*  
Ronald Fogel, MD\*  
Wilmer Rutt, MD\*

### Co-principal Investigator

Christine Cole Johnson, PhD, MPH  
Lois Lamerato, PhD, MS  
Robert S. Bresalier, MD\*

### Coordinator

Karen Broski

### Investigator

Sharon Hensley-Alford, PhD  
Marvella E. Ford, PhD\*  
Jennifer Elston LaFata, PhD\*  
Bruce McCarthy, MD\*  
Richard Ward, MD\*

### Data Manager

Tara Andrews  
Margie Day\*  
Lynn M. Flickinger, MA\*  
Teresa Hantz  
Dorothea Talley\*  
Diana Wilson\*

### Epidemiologist

Angela Blount, MPH\*  
C. Martin Tammemagi, PhD, DVM

### Abstractor

Nimisha Goswami  
Wendy Haykus  
Angela Piasecki  
Claudia Barr\*  
Timothy Hall\*  
Sherrie Stanifer\*  
Patricia Baker\*  
Rita Montague\*

### Clerical Staff

Charlotte Day\*  
Anna Nanovski\*  
Cynthia Hill\*  
Teresa Boles\*  
Audrey Witherspoon\*  
Gina Banks\*  
Karen Green\*  
Kathy Bernardin\*  
Paul Kozlowski\*  
Jan Wells\*  
Holly Salisbury\*  
Anne Shepard\*  
Jackie McKeeman\*  
Tonya Jeffery\*  
Cherice Castor\*  
Markieta Boswell\*

### Data Management Support Staff

Claire Hooker  
Lisa Ingram  
Dojna Mototolea  
Nora Szabo  
Mylitta Gardner  
Claire Hooker  
Noel Maddy\*  
Juanita Morris\*  
Judith Berlicz\*  
Tavia Bonds\*  
Shelley Fountain\*  
Millie Williams\*  
Boban Djuric\*  
Mylitta Gardner\*

### Screening Center Staff

Christine Cross\*  
Deborah Emmer, BSN\*  
Fran Jagger, RN\*  
Amena Johnson\*  
Linda McCarver, RN\*  
Melissa Scharbonneau\*  
Virginia Thomas\*  
Marquette Norwood\*  
Madeline Mobley, MSN\*  
SueAnn Kokko, MSN\*  
Darlene Doute, MSN\*  
Karen Ciccoretti, RN\*  
Karen Wilkinson Wright, RN\*  
Pamela Shabazz, RN\*  
Anna Leyson-Fiel, RN\*  
Kathy Pratt, RN\*  
Mary Bailey\*

Toyia Alexander\*

Joann LaBeau Kok\*

---

**University of Minnesota (Minneapolis, Minnesota)**

Principal Investigator

Timothy R. Church, PhD  
Jack Mandel, PhD, MPH\*

Fiscal Coordinator  
Jim Fisher

Co-principal Investigator

Martin M. Oken, MD

Research Fellow/Assistant

Mindy Geisser  
Steve Mongin  
Christina Oancea  
Ricky Jansen

Study Coordinator

Deb Engelhard, MA

Clinic Coordinator

Jill Cordes, RN

Phoning Staff

Sophie Breer  
Susan Collins  
Janet Manuel  
LeAnn Matous  
Lois Miller\*  
Candace Muller  
Phyllis Olsson  
Susan Peterson  
Mary Lynn Steele  
Susan Tonnell  
Jennifer Halverson, BS\*  
Margaret Hanna\*  
Jan Hathaway-Ott\*  
Betty Harper\*  
Helen Hunter, BA\*  
Judy Lindall-Hawkins, MA\*  
Cathy Longen, BA\*  
Shirlyn Nickelson\*  
Doris Overby\*  
MaryAnn Rodier\*  
Barbara Smith\*  
Virginia Weiner\*

Clerical Staff

Peggy Bradley  
Carol Hansen\*  
Joshua Kokubu  
Ryan Lee  
Gabrielle Meyer  
Heather McLaughlin\*  
Krista Palmquist  
Nissa Sandley  
Brad Sigal  
Tanya Barnes, BA\*  
Michelle Fleishhacker, BA\*  
Jason Grengs, BA\*  
Shannon Hebner\*  
Michael Lewis, MLS\*  
AnaMaria Mendez\*  
Deanna Miller\*  
Jennifer Nielsen, AS  
Lori Theis\*

Computer Staff

Ann Bangerter\*  
Donna DesMarais  
Natalya Portnov  
Greg Silverman  
Frank Strahan  
Simone Vuong  
Gavin Watt, BA  
Aaron Zirbes  
Ann Fredrickson, BA\*  
Richard Hoffbeck, BA\*  
Robert Murzyn\*  
Joseph Woodside, MA, PhD\*

Medical Record Abstractor

Mary Clement\*  
Cheri Haselhuhn  
Darlene Heath  
Elaine Julin  
Nita Michels\*  
Linda Naslund  
Surekha Pagidipala\*  
DeeAnn Swavely, RN  
Carla Sykta\*  
Deborah Warren

Clinic Nurse

Patricia Beckmann, RN  
Mark Boldt, RN  
Linda Jurjans, RN  
Susan Swenson, RN  
Shirley Terrien, RN

Clinic Clerical Staff

Jann Sitarz  
Carol Steinberg  
JoAnn Thomas

Laboratory Technologist

Jeff Burrell  
Linda Sandell

Equipment Processor  
Scott Helevik  
Mark Hoard

---

**Washington University School of Medicine (St. Louis, Missouri)**

**Principal Investigator**

Gerald L. Andriole, MD

**Coordinator**

Adelheid A. Lowery, RN, MS\*

Elaine Freesmeier

**Study Coordinator**

Elaine Charlton, RN\*

Ann Desai, RN\*

Vivien Gardner, RN, BSN\*

**Data Manager**

Debbie Stanczak\*

Kathy Taylor\*

**Clinical Coordinator**

Karen Civitelli, RN\*

Katherine Ehrhard, RN\*

Patricia Nieters, RN\*

**Recruiter**

Cindy Hilke, BA\*

Kate Phillips\*

Wanda Robinson, BA

Michelle Wehde\*

**Part-Time Recruitment Staff**

Carol Branam\*

Kristin Freesmeier\*

Candy Kane\*

Sharon Murphey\*

Dave Royal\*

Joann Scire\*

**Data Entry Staff**

Kelly Bickford\*

Elizabeth Fleming

Julie Goforth\*

Deborah Graham\*

Jane Montani\*

Kate Naughton\*

Becky Palumbo\*

Jayne Sicard-Su\*

**Examiner**

Rita Blanke, RN

Pat Cashel, LPN\*

Kelly DeFord, MA\*

Kourtney Liddy, RN\*

Angela Lieberoff, RN, BSN\*

Karen Nelson, MA\*

Lisa Reismeyer, RN\*

Barb Ritter, RN\*

Shelly Robertson, RN\*

Shelly Standbrook, RN\*

Darlene Stilts, RN\*

**Lead Medical Record Abstractor**

Janise Webb, RHIT, CTR

**Medical Record Abstractor**

Kathy Carrett, RHIT

Sydney Laster, CTR

Celia Stolin\*



---

**University of Pittsburgh Cancer Institute (Pittsburgh, Pennsylvania)**

Principal Investigator

Joel L. Weissfeld, MD, MPH

Co-principal Investigator

Robert E. Schoen, MD, MPH

Co-investigator

Lyndon Hill, MD\*

Thomas Hakala, MD\*

Richard Guido, MD\*

Carl Fuhrman, MD\*

Wylie Overly, MD\*

Julian W. Proctor, MD\*

Matthew Sulecki, MD\*

Mark Trombetta, MD\*

Coordinator

Betsy Gahagan, BSN, CTR

Recruiter

Janet Bonk, RN, MPH\*

Mary Yagjian\*

Roni Gitchel, BS\* (deceased)

Data Manager

Pam Sufka

Kathleen McDonough

Clinic Staff

Kathleen Carl \*

Janet Gongloff\*

Terry Karl, BSN\*

Carol Lucas, RN\*

Lynn Lytle, RN\*

Marcia Sibbet\*

Judy Weinstein\*

Data Coordinator

Betty Coopie\*

Lucinda Dyjak

Lettie Johnson

Jan Kielty\*

Ginny Landis\*

Sue Misko

Peggy Oleson\*

Mary Ritman

Medical Record Abstractor

Lisa Clement, CRNP

Ann Danvers, CRNP\*

Mary Alyce Riley, CRNP\*

---

**University of Utah Health Sciences Center (Salt Lake City, Utah)**

Principal Investigator

Sandra S. Buys, MD

Coordinator

Lisa H. Gren, MSPH

Recruitment Staff

Jeffery Childs

Adriane Andersen\*

Jennifer Bacon\*

Marie Bossi\*

Laura Briscoe\*

Mark Broschinsky\*

Bill Callahan\*

Thomas Conner\*

Jenni Ernst\*

Rachel Fischer, MSPH\*

Jeremy Gregersen\*

Nickolas Hamatake\*

Chris Hamatake\*

Amity Henrichsen\*

Nikole Ihler\*

Lesli Jensen\*

Kara Jones\*

Lindsay Killian\*

Mindy Liddle\*

Mary Lochner\*  
Alie Monaco\*  
Robert Morreal\*  
Amy Nate\*  
Kimberly Nolan\*  
Cassie Olson\*  
Andee Park\*  
Shannon Ricks\*  
Scott Sheltra\*  
Alina Stewart\*  
Lisa Sturges\*  
Julie Sullenger\*  
Kristi Taylor\*  
Chris Toyn\*  
Eduard Van Stam\*

Marcia Reese\*  
Brienne Whittaker\*  
Nathan Whittaker\*  
Eddy Wicklander  
Jake Wolf\*

Medical Record Abstracting Staff  
Julie Varner, CTR, CPC  
Niela Bennett, CTR\*  
Michele Bonoacci, CTR, RHIT\*  
Angela Harper, RHIT\*  
Sandra Reay, CTR\*

Data Entry Staff  
Neil Argyle\*  
Jeff Christensen  
Sue Bennett\*  
Jeremy Biggs\*  
Donna Branson\*  
Melanie Bryson\*  
Brandon Childs\*  
Cherie Dalton  
Brian Doi  
Jenifer Doi\*  
Susan Foss\*  
Paulina Gudgeall\*  
Linda Hicks\*  
Polly Hsu\*  
Devon LaMay\*  
Chani Montalbo\*  
Linda Newman\*  
Anne Randall  
Judy Thompson\*  
Karen Schliep\*  
Kasey Stanfield\*  
Darcy Watson\*  
Linda Newman\*

Clinical Staff  
Kathleen McFadden, BSN\*  
Karen O'Toole, RN  
Toni Butcher\*  
Darrelle Walker, BSN\*  
Johathan Richardson, MA\*  
Howard Hong, BSN\*  
Barbara Lund, RN\*  
Jennifer Rowley\*  
Jon Tlachac\*  
John VanRy\*  
Crystal Walker, RN\*

Examiner Training and Quality Assurance  
Blake Hamilton, MD\*  
Richard Labasky, MD\*  
Stewart Landau, MD\*  
Richard Middleton, MD\*  
Robert Stephenson, MD\*

---

**University of Utah Satellite, St. Luke's Mountain States Tumor Institute (Boise, Idaho)**

Satellite Principal Investigator  
Thomas M. Beck, MD

Coordinator  
Lisa Sturges, MSPH\*  
Bonita Wohlers, MS, RN

Data Entry  
Kathy Berreth\*

Pamela Roberts\*

Clinical Staff

Patricia Carter, RN\*  
Dawn Goodman\*  
Gena Hagerman, MA\*  
Tiffany Hon, RN\*  
Janette Marshock, RN\*  
Rolanda Martin, BSN\*

Transvaginal Ultrasonographers

Carole Jamieson, RDMS, RVT\*  
Andrea Arnone, RDMS\*  
Dalene Davis, RT, RDMS\*  
Kathleen Dennis, RDMS\*  
Deanna Hanson, RDMS\*  
Jan Hyder, TR\*  
Doug McCraney, RDMS\*  
Kevin Michel, RDMS\*  
Farzaneh Shahriari, RT\*  
Lisa Sirianni, RT\*

Radiologists

Todd Bruce Burt, MD\*  
Charles R. Carrasco, MD\*  
Elaine N. Daniel, MD\*  
Richard H. Lane, MD\*  
Peter A Langhus, MD\*  
Craig E. Leymaster, MD\*  
James R. Maxwell, MD\*  
Ray M. Thorpe, MD\*  
Brent D. Nelson, MD\*  
Steven V. Marx, MD\*  
Bruce Hubler, MD\*  
John S. Waltz, MD\*  
Quinn A DeMordaunt, MD\*  
Michael T. Fisher, MD\*

Examiner Training and Quality Assurance

Paul Battershall, NP\*  
Louis Burke, PA-C\*  
Lorranine Fortunati, NP\*  
John M Werdel, MD\*

---

**Marshfield Medical Research and Education Foundation (Marshfield, Wisconsin)**

Principal Investigator

Douglas Reding, MD, MPH, FACP

Co-investigator

Robert Greenlee, PhD  
William Hocking, MD

Study Coordinator

Karen Lappe, BSN

Clinical Research Manager

Deborah Multerer

Health Educator/Recruiter

Virginia Fischer, MS\*

Systems Support Specialist

Juline C. Heiting\*  
Cathy Mueller\*

Certified Medical Assistant

Kay Mathiesen-Viergutz, CMA

Administrative Secretary

Kari Bohman\*  
Laurel Carey\*

Nurse Clinician/Medical Abstractors

Amy Vieth, BSN  
Kelly Aue, BSN\*  
Denise Kriescher, RN\*  
Claudia Miller, BSN\*  
Norma Thums, BSN\*  
Sheila Wein, BSN\*

Licensed Practical Nurse

Karen Kofka, LPN\*

Certified Tumor Registrar

Karen Luttrupp

Cancer Control Clerk

Camille Mueller\*

Appointment Coordinator

Brenda Dix\*  
Lin Mueller\*

Kathy Swensen\*

Shirley Wachholz\*

Data Entry Clerk

Ranae Kramer  
Becky Bright\*  
Sue Zahradka\*

---

**University of Alabama at Birmingham (Birmingham, Alabama)**

Principal Investigator

Mona Fouad, MD, MPH  
Albert Oberman, MD, MPH\*

Co-investigator

Edward Partridge, MD (Ob/Gyn)  
Donald Urban, MD (Urology)  
Catarina Kiefe, MD, PhD  
James Shikany, DrPH

Project Manager

Darlene Higgins

Recruitment Coordinator

Joanice Thompson

Retention Coordinator

Mel Johnson

Clinic Coordinator, Flex Sigmoidoscope

Examiner

Alisha Moore, CRNP\*  
Beverly Powell, CRNP\*

Data Manager

Billy McCoy\*  
Christie Oden

Medical Record Abstractor, Transvaginal

Ultrasound Examiner

Rekha Khatri, CTR

Clinic Coordinator

Margaret Pike, RN

**Cancer Institute of Brooklyn at Maimonides Medical Center (Brooklyn, New York)**

Principal Investigator  
Sameer Rafla, MD, PhD\*

Coordinator  
Annette Angelone, RN\*

Recruitment Manager  
Vivienne DeStefano\*

Data Manager  
Jerry Varkey\*

Project Coordinator      Sandra Watson\*

Director, Cancer Control  
Josephine M. DiVernieri\*

---
